# Supplementary material for: Sample preparation considerations for surface and crystalline properties and ecotoxicity of bare and silica-coated magnetite nanoparticles
Source: Royal Society of Chemistry journal article supplement (doi:10.1039/d1ra05703k), 2021-01-01
Supplement: d1ra05703k1.pdf [file d1ra05703k1.pdf]

**Table 1S.** Microstructure of MNPs

| Sample                           | Fe <sub>3</sub> O <sub>4</sub> (Ar) [Bondarenko et al., 2021] |       |          | Fe <sub>3</sub> O <sub>4</sub> (air) |           |           | Fe <sub>3</sub> O <sub>4</sub> /APTES (Ar) [Bondarenko et al., 2021] |       |          | Fe <sub>3</sub> O <sub>4</sub> /APTES (air) [Bondarenko et al., 2021] |       |          |
|----------------------------------|---------------------------------------------------------------|-------|----------|--------------------------------------|-----------|-----------|----------------------------------------------------------------------|-------|----------|-----------------------------------------------------------------------|-------|----------|
|                                  | hkl                                                           | 2Q, ° | d, Å     | FWHM                                 | 2Q, °     | d, Å      | FWHM                                                                 | 2Q, ° | d, Å     | FWHM                                                                  | 2Q, ° | d, Å     |
| 220                              | 45.45                                                         | 2.965 | 0.636(8) | 45.65                                | 8.352 (1) | 13.759(1) | 45.45                                                                | 2.96  | 0.504(9) | 45.65                                                                 | 2,956 | 0.721(6) |
| 311                              | 53.90                                                         | 2.527 | 0.662(2) | 54.05                                | 8.361(5)  | 13.448(2) | 53.95                                                                | 2.53  | 0.679(5) | 54.05                                                                 | 2,519 | 1.731(2) |
| 400                              | 66.30                                                         | 2.095 | 0.780(1) | 66.4                                 | 8.368(2)  | 16.384(1) | 66.3                                                                 | 2.095 | 0.890(4) | 66.4                                                                  | 2,089 | 0.822(1) |
| 422                              | 83.85                                                         | 1.714 | 0.975(2) | 84.2                                 | 8.370(6)  | 16.967(1) | 84.05                                                                | 1.712 | 0.844(9) | 84.45                                                                 | 1,707 | 0.785(1) |
| 511                              | 90.70                                                         | 1.610 | 0.940(7) | 90.7                                 | 8.366(9)  | 16.721(2) | 0.75                                                                 | 1.61  | 0.828(5) | 90.7                                                                  | 1,609 | 1.891(3) |
| 440                              | 101.35                                                        | 1.481 | 0.899(1) | 101.55                               | 8.364(9)  | 12.195(3) | 101.37                                                               | 1.481 | 1.026(6) | 101.55                                                                | 1,477 | 0.824(4) |
| a, Å                             | 8.3813                                                        |       |          | 8.3641                               |           |           | 8.3789                                                               |       |          | 8.3603                                                                |       |          |
| X                                | 0.37                                                          |       |          | 0.22                                 |           |           | 0.35                                                                 |       |          | 0.187                                                                 |       |          |
| δ                                | 0.069                                                         |       |          | 0.162                                |           |           | 0.08                                                                 |       |          | 0.186                                                                 |       |          |
| Structure                        | Fe <sub>2,93</sub> O <sub>4</sub>                             |       |          | Fe <sub>2,84</sub> O <sub>4</sub>    |           |           | Fe <sub>2,92</sub> O <sub>4</sub>                                    |       |          | Fe <sub>2,81</sub> O <sub>4</sub>                                     |       |          |
| % Fe <sub>3</sub> O <sub>4</sub> | 78.8                                                          |       |          | 50.7                                 |           |           | 75.8                                                                 |       |          | 42.4                                                                  |       |          |
| D <sub>XRD</sub> , nm            | 17.1±2.3                                                      |       |          | 14.9±2.02                            |           |           | 20.5±3.3                                                             |       |          | 16.5±1.96                                                             |       |          |
| CV, %                            | 13.5                                                          |       |          | 13.5                                 |           |           | 16.1                                                                 |       |          | 9.5                                                                   |       |          |

hkl – Miller indexes; d - interplanar distance, Å; Q - angle at which the reflex was measured; FWHM - full width at half maximum of XRD reflex; a - interplanar distance, Å; X - the Fe<sup>2+</sup>/Fe<sup>3+</sup> ratio; δ – calculated value, which range from zero (stoichiometric magnetite) to 1/3 (completely oxidized); D<sub>XRD</sub> - average particle size calculated by the Scherrer equation ± standard deviation, nm

**Table 2S.** Magnetic properties of bare and modified MNPs

| Sample                                      | Saturation magnetization Ms, emu/g | Remanent magnetization Mr, emu/g | Coercive force Hc, Oe |
|---------------------------------------------|------------------------------------|----------------------------------|-----------------------|
| Fe <sub>3</sub> O <sub>4</sub> (Ar)         | 81.2                               | 6.88                             | 74.1                  |
| Fe <sub>3</sub> O <sub>4</sub> (air)        | 49.9                               | 5.20                             | 160                   |
| Fe <sub>3</sub> O <sub>4</sub> -APTES (Ar)  | 68.7                               | 6.65                             | 163                   |
| Fe <sub>3</sub> O <sub>4</sub> -APTES (air) | 30.8                               | 4.41                             | 159                   |

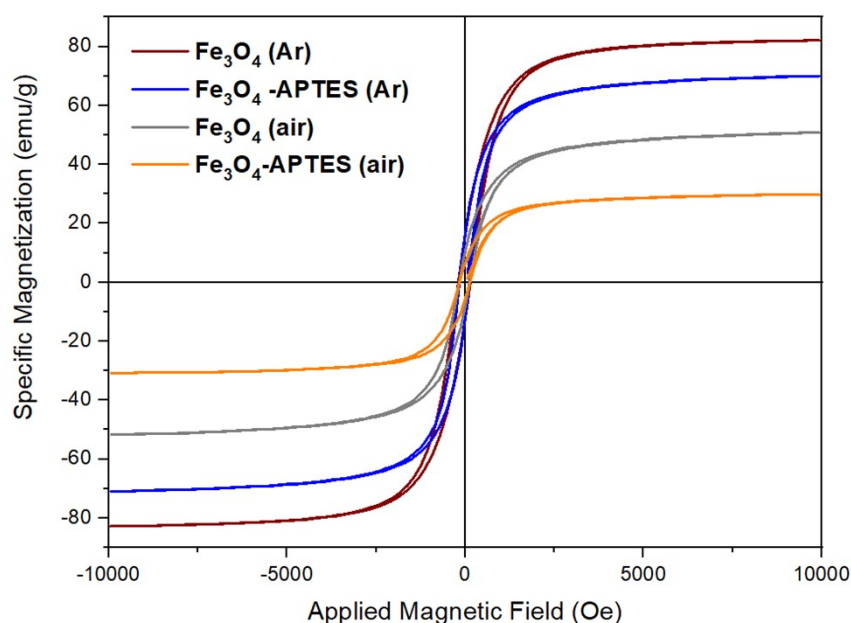

**Figure 1S.** Magnetic properties of MNPs

**Table 3S.** pH-dependence of samples

| Sample                   | Concentration, mg/L | pH  | Zeta potential, mV ± SD | Hydrodynamic diameter, nm |
|--------------------------|---------------------|-----|-------------------------|---------------------------|
| <b>Fe3O4 (Ar)</b>        | 10,0                | 5,4 | 20,1±4.5                | 473,0±63.3                |
|                          | 1,00                | 5,8 | -8,8±0.9                | 744,7±102.5               |
|                          | 0,500               | 6,7 | -14,6±1.7               | 470,9±73.8                |
|                          | 0,100               | 6,7 | -15,4±3.8               | 443,9±109.9               |
|                          | 0,0100              | 6,7 | -20,8±4.3               | 404,5±112.4               |
| <b>Fe3O4 (air)</b>       | 10,0                | 4,0 | 10,2±1.9                | 756,4±85.7                |
|                          | 1,00                | 5,1 | -2,1±1.7                | 769,9±19.4                |
|                          | 0,500               | 7,5 | -13,2±3.6               | 852,8±27.6                |
|                          | 0,100               | 7,5 | -15,9±4.7               | 780,6±97.7                |
|                          | 0,0100              | 7,6 | -15,0±3.2               | 724,3±23.2                |
| <b>Fe3O4/APTES (Ar)</b>  | 10,0                | 6,1 | 43,6±5.1                | 672,4±69.1                |
|                          | 1,00                | 6,1 | 15,0±2.5                | 957,1±140.2               |
|                          | 0,500               | 6,2 | -16,1±0.3               | 821,3±                    |
|                          | 0,100               | 6,5 | 23,6±3.5                | --                        |
|                          | 0,0100              | 6,5 | -19,6±2.6               | 606,5±68.5                |
| <b>Fe3O4/APTES (air)</b> | 10,0                | 6,4 | 43,3±2.0                | 725,6±58.8                |
|                          | 1,00                | 7,0 | 43,5±3.5                | 728,5±62.7                |
|                          | 0,500               | 7,5 | 4,4±2.8                 | 737,9±89.2                |
|                          | 0,100               | 7,4 | -15,6±3.5               | 720,5±82,2                |
|                          | 0,0100              | 7,5 | -21,2±4.2               | 748,4±27.4                |

**Table 4S.** ANOVA (Tukey's multiple comparisons test and p-value, before fractionation) of initial MNPs

|              | mg/L   |
|--------------|--------|
| <b>Row 1</b> | 10.0   |
| <b>Row 2</b> | 1.00   |
| <b>Row 3</b> | 0.500  |
| <b>Row 4</b> | 0.100  |
| <b>Row 5</b> | 0.0100 |

|                                               | p-value            |                |
|-----------------------------------------------|--------------------|----------------|
|                                               | <i>P. caudatum</i> | <i>S. alba</i> |
| <b>Fe<sub>3</sub>O<sub>4</sub> (Ar)</b>       |                    |                |
| Row 1 vs. Row 2                               | 0.0915             | 0.9996         |
| Row 1 vs. Row 3                               | 0.1309             | 0.3511         |
| Row 1 vs. Row 4                               | 0.082              | 0.2872         |
| Row 1 vs. Row 5                               | 0.3109             | 0.9431         |
| Row 2 vs. Row 3                               | 0.993              | 0.4691         |
| Row 2 vs. Row 4                               | 0.9579             | 0.3945         |
| Row 2 vs. Row 5                               | 0.9463             | 0.9823         |
| Row 3 vs. Row 4                               | 0.9305             | >0.9999        |
| Row 3 vs. Row 5                               | 0.9999             | 0.794          |
| Row 4 vs. Row 5                               | 0.9494             | 0.7223         |
| <b>Fe<sub>3</sub>O<sub>4</sub> (air)</b>      |                    |                |
| Row 1 vs. Row 2                               | 0.0496             | 0.9996         |
| Row 1 vs. Row 3                               | 0.0404             | 0.9997         |
| Row 1 vs. Row 4                               | 0.0391             | 0.9903         |
| Row 1 vs. Row 5                               | 0.0079             | 0.5839         |
| Row 2 vs. Row 3                               | 0.9987             | >0.9999        |
| Row 2 vs. Row 4                               | 0.9926             | 0.9616         |
| Row 2 vs. Row 5                               | >0.9999            | 0.7119         |
| Row 3 vs. Row 4                               | 0.9964             | 0.9643         |
| Row 3 vs. Row 5                               | >0.9999            | 0.704          |
| Row 4 vs. Row 5                               | 0.9657             | 0.3171         |
| <b>Fe<sub>3</sub>O<sub>4</sub>/APTES (Ar)</b> |                    |                |
| Row 1 vs. Row 2                               | 0.0354             | 0.3149         |
| Row 1 vs. Row 3                               | 0.0007             | 0.9818         |

|                                                                                            |        |         |
|--------------------------------------------------------------------------------------------|--------|---------|
| Row 1 vs. Row 4                                                                            | 0.0022 | 0.8465  |
| Row 1 vs. Row 5                                                                            | 0.0004 | >0.9999 |
| Row 2 vs. Row 3                                                                            | 0.1086 | 0.1167  |
| Row 2 vs. Row 4                                                                            | 0.047  | 0.8846  |
| Row 2 vs. Row 5                                                                            | 0.1677 | 0.304   |
| Row 3 vs. Row 4                                                                            | 0.5082 | 0.5314  |
| Row 3 vs. Row 5                                                                            | 0.4321 | 0.9844  |
| Row 4 vs. Row 5                                                                            | 0.9545 | 0.8362  |
| <b>Fe<sub>3</sub>O<sub>4</sub>/APTES (air)</b>                                             |        |         |
| Row 1 vs. Row 2                                                                            | 0.4857 | 0.5227  |
| Row 1 vs. Row 3                                                                            | 0.0427 | 0.9939  |
| Row 1 vs. Row 4                                                                            | 0.002  | 0.9923  |
| Row 1 vs. Row 5                                                                            | 0.0099 | 0.9641  |
| Row 2 vs. Row 3                                                                            | 0.1052 | 0.7693  |
| Row 2 vs. Row 4                                                                            | 0.0413 | 0.7841  |
| Row 2 vs. Row 5                                                                            | 0.1529 | 0.1919  |
| Row 3 vs. Row 4                                                                            | 0.496  | >0.9999 |
| Row 3 vs. Row 5                                                                            | 0.8348 | 0.8232  |
| Row 4 vs. Row 5                                                                            | 0.9998 | 0.8096  |
|                                                                                            |        |         |
| Fe <sub>3</sub> O <sub>4</sub> (Ar) vs. Fe <sub>3</sub> O <sub>4</sub> (air)               | 0.7586 | 0.7104  |
| Fe <sub>3</sub> O <sub>4</sub> (Ar) vs. Fe <sub>3</sub> O <sub>4</sub> /APTES (Ar)         | 0.9412 | 0.9842  |
| Fe <sub>3</sub> O <sub>4</sub> (Ar) vs. Fe <sub>3</sub> O <sub>4</sub> /APTES (air)        | 0.2243 | 0.9425  |
| Fe <sub>3</sub> O <sub>4</sub> (air) vs. Fe <sub>3</sub> O <sub>4</sub> /APTES (Ar)        | 0.9754 | 0.4922  |
| Fe <sub>3</sub> O <sub>4</sub> (air) vs. Fe <sub>3</sub> O <sub>4</sub> /APTES (air)       | 0.0247 | 0.4377  |
| Fe <sub>3</sub> O <sub>4</sub> /APTES (Ar) vs. Fe <sub>3</sub> O <sub>4</sub> /APTES (air) | 0.0695 | 0.9949  |

**Table 5S.** ANOVA (Tukey's multiple comparisons test and p-value, after fractionation) of initial, centrifuged and filtered MNPs

|                                                                                            | p-value            |                |
|--------------------------------------------------------------------------------------------|--------------------|----------------|
|                                                                                            | <b>P. caudatum</b> | <b>S. alba</b> |
| <b>Fe<sub>3</sub>O<sub>4</sub> (Ar)</b>                                                    |                    |                |
| ini vs. cent                                                                               | <0.0001            | 0.0639         |
| ini vs. filtr                                                                              | <0.0001            | 0.9249         |
| cent vs. filtr                                                                             | 0.1969             | 0.1332         |
| <b>Fe<sub>3</sub>O<sub>4</sub> (air)</b>                                                   |                    |                |
| ini vs. cent                                                                               | 0.9681             | 0.0002         |
| ini vs. filtr                                                                              | 0.9681             | 0.9996         |
| cent vs. filtr                                                                             | >0.9999            | 0.0002         |
| <b>Fe<sub>3</sub>O<sub>4</sub> /APTES (Ar)</b>                                             |                    |                |
| ini vs. cent                                                                               | <0.0001            | 0.9997         |
| ini vs. filtr                                                                              | <0.0001            | 0.0889         |
| cent vs. filtr                                                                             | 0.5136             | 0.0849         |
| <b>Fe<sub>3</sub>O<sub>4</sub> APTES (air)</b>                                             |                    |                |
| ini vs. cent                                                                               | <0.0001            | 0.0013         |
| ini vs. filtr                                                                              | 0.0005             | <0.0001        |
| cent vs. filtr                                                                             | 0.1588             | 0.4086         |
| <b>initial</b>                                                                             |                    |                |
| Fe <sub>3</sub> O <sub>4</sub> (Ar) vs. Fe <sub>3</sub> O <sub>4</sub> (air)               | 0.0966             | 0.5715         |
| Fe <sub>3</sub> O <sub>4</sub> (Ar) vs. Fe <sub>3</sub> O <sub>4</sub> /APTES (Ar)         | 0.0992             | 0.9963         |
| Fe <sub>3</sub> O <sub>4</sub> (Ar) vs. Fe <sub>3</sub> O <sub>4</sub> /APTES (air)        | 0.3264             | 0.0004         |
| Fe <sub>3</sub> O <sub>4</sub> (air) vs. Fe <sub>3</sub> O <sub>4</sub> /APTES (Ar)        | 0.9937             | 0.7025         |
| Fe <sub>3</sub> O <sub>4</sub> (air) vs. Fe <sub>3</sub> O <sub>4</sub> /APTES (air)       | <0.0001            | <0.0001        |
| Fe <sub>3</sub> O <sub>4</sub> /APTES (Ar) vs. Fe <sub>3</sub> O <sub>4</sub> /APTES (air) | 0.0003             | 0.0003         |
| <b>centrifugation</b>                                                                      |                    |                |
| Fe <sub>3</sub> O <sub>4</sub> (Ar) vs. Fe <sub>3</sub> O <sub>4</sub> (air)               | 0.0028             | <0.0001        |
| Fe <sub>3</sub> O <sub>4</sub> (Ar) vs. Fe <sub>3</sub> O <sub>4</sub> /APTES (Ar)         | 0.9789             | 0.1557         |
| Fe <sub>3</sub> O <sub>4</sub> (Ar) vs. Fe <sub>3</sub> O <sub>4</sub> /APTES (air)        | 0.4124             | 0.0251         |

|                                                                                            |        |        |
|--------------------------------------------------------------------------------------------|--------|--------|
| Fe <sub>3</sub> O <sub>4</sub> (air) vs. Fe <sub>3</sub> O <sub>4</sub> /APTES (Ar)        | 0.0017 | 0.0066 |
| Fe <sub>3</sub> O <sub>4</sub> (air) vs. Fe <sub>3</sub> O <sub>4</sub> /APTES (air)       | 0.0018 | 0.0502 |
| Fe <sub>3</sub> O <sub>4</sub> /APTES (Ar) vs. Fe <sub>3</sub> O <sub>4</sub> /APTES (air) | 0.5484 | 0.8121 |
| <b>filtration</b>                                                                          |        |        |
| Fe <sub>3</sub> O <sub>4</sub> (Ar) vs. Fe <sub>3</sub> O <sub>4</sub> (air)               | 0.0006 | 0.8073 |
| Fe <sub>3</sub> O <sub>4</sub> (Ar) vs. Fe <sub>3</sub> O <sub>4</sub> /APTES (Ar)         | 0.824  | 0.1967 |
| Fe <sub>3</sub> O <sub>4</sub> (Ar) vs. Fe <sub>3</sub> O <sub>4</sub> /APTES (air)        | 0.2991 | 0.9955 |
| Fe <sub>3</sub> O <sub>4</sub> (air) vs. Fe <sub>3</sub> O <sub>4</sub> /APTES (Ar)        | 0.0089 | 0.6575 |
| Fe <sub>3</sub> O <sub>4</sub> (air) vs. Fe <sub>3</sub> O <sub>4</sub> /APTES (air)       | 0.0025 | 0.9094 |
| Fe <sub>3</sub> O <sub>4</sub> /APTES (Ar) vs. Fe <sub>3</sub> O <sub>4</sub> /APTES (air) | 0.9409 | 0.2872 |

\* **ini** – initial, **cent** – centrifugation, **filtr** - filtration
